# Supplementary material for: Effects of Lapatinib on HER2-Positive and HER2-Negative Canine Mammary Carcinoma Cells Cultured In Vitro
Source: MDPI journal article supplement (doi:10.3390/pharmaceutics13060897), 2021-06-17
Supplement: s1 [file s1]

## Supplementary Materials: Effects of Lapatinib on HER2-Positive and HER2-Negative Canine Mammary Carcinoma Cells Cultured In Vitro

Antonio Fernando Leis Filho, Patrícia de Faria Lainetti, Priscila Emiko Kobayashi, Carlos Eduardo Fonseca Alves and Renée Laufer Amorim

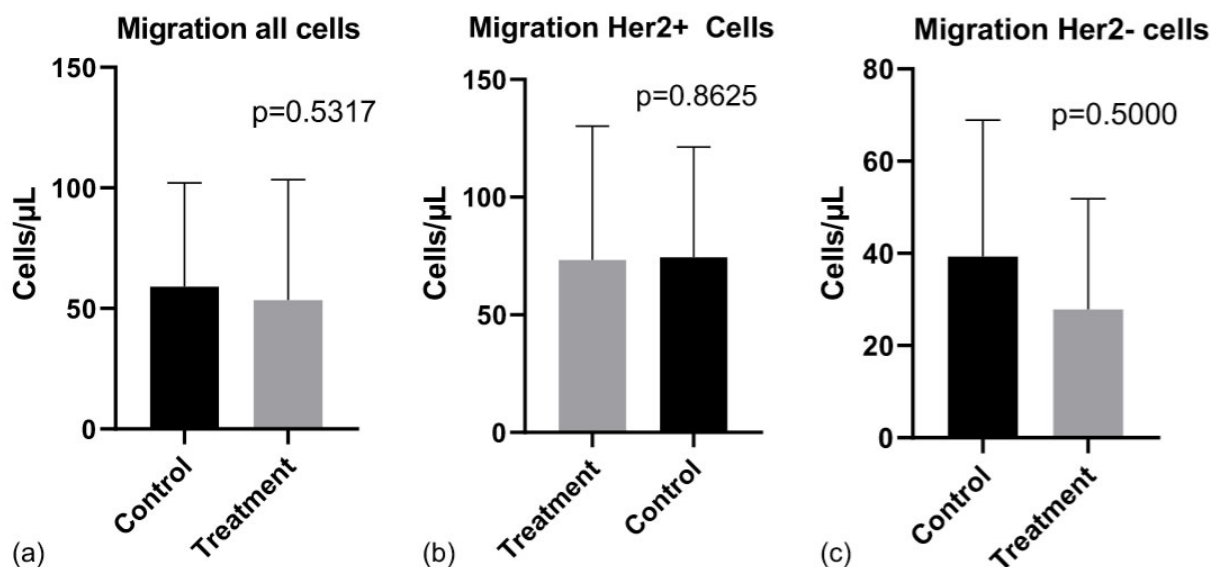

**Figure S1.** Mann-Whitney analysis of cell migration. There was no statistical difference in any analysis (a): All cell cultures. (b): HER2+ cell cultures. (c): HER2- cell cultures.

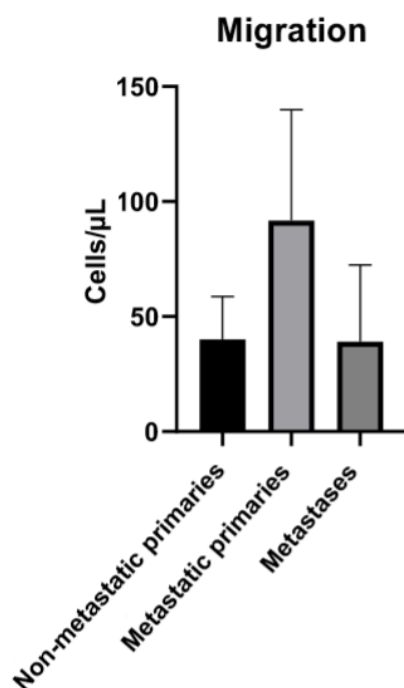

**Figure S2.** ANOVA evaluation of cell culture migration when grouped into non-metastatic primaries, metastatic primaries and metastases. Non-metastatic primaries versus metastatic primaries  $p = 0.2873$ ; Non-metastatic primaries versus metastases  $p = 1$ ; Metastatic primaries versus metastases  $p = 0.1822$ .

**Table S1.** Clinical data from animals with mammary carcinoma used for primary cell culture (Lainetti *et al.*, 2020).

| Identification | Breed       | Age (Years) | Histologic classification <sup>1</sup> |
|----------------|-------------|-------------|----------------------------------------|
| UNESP-CM1      | Poodle      | 12          | Solid carcinoma                        |
| UNESP-CM5      | Teckel      | 10          | Solid carcinoma                        |
| UNESP-CM9      | Mixed breed | 12          | Solid carcinoma                        |
| UNESP-CM60     | Teckel      | 14          | Adenosquamous carcinoma                |
| UNESP-MM1      | Poodle      | 12          | UNESP-CM1 bone metastasis              |
| UNESP-MM4      | Teckel      | 14          | UNESP-CM60 lymph node metastasis       |

<sup>1</sup> Neoplasms were classified and graded following Goldschmidt *et al.*, 2011.
